# Supplementary material
Source: Springer Nature journal article supplement (https://www.springermedizin.de/resource/supplementary/12888_2011_967_MOESM4_ESM.pdf/9479284)
Supplement: MOESM4 [file 9479284]

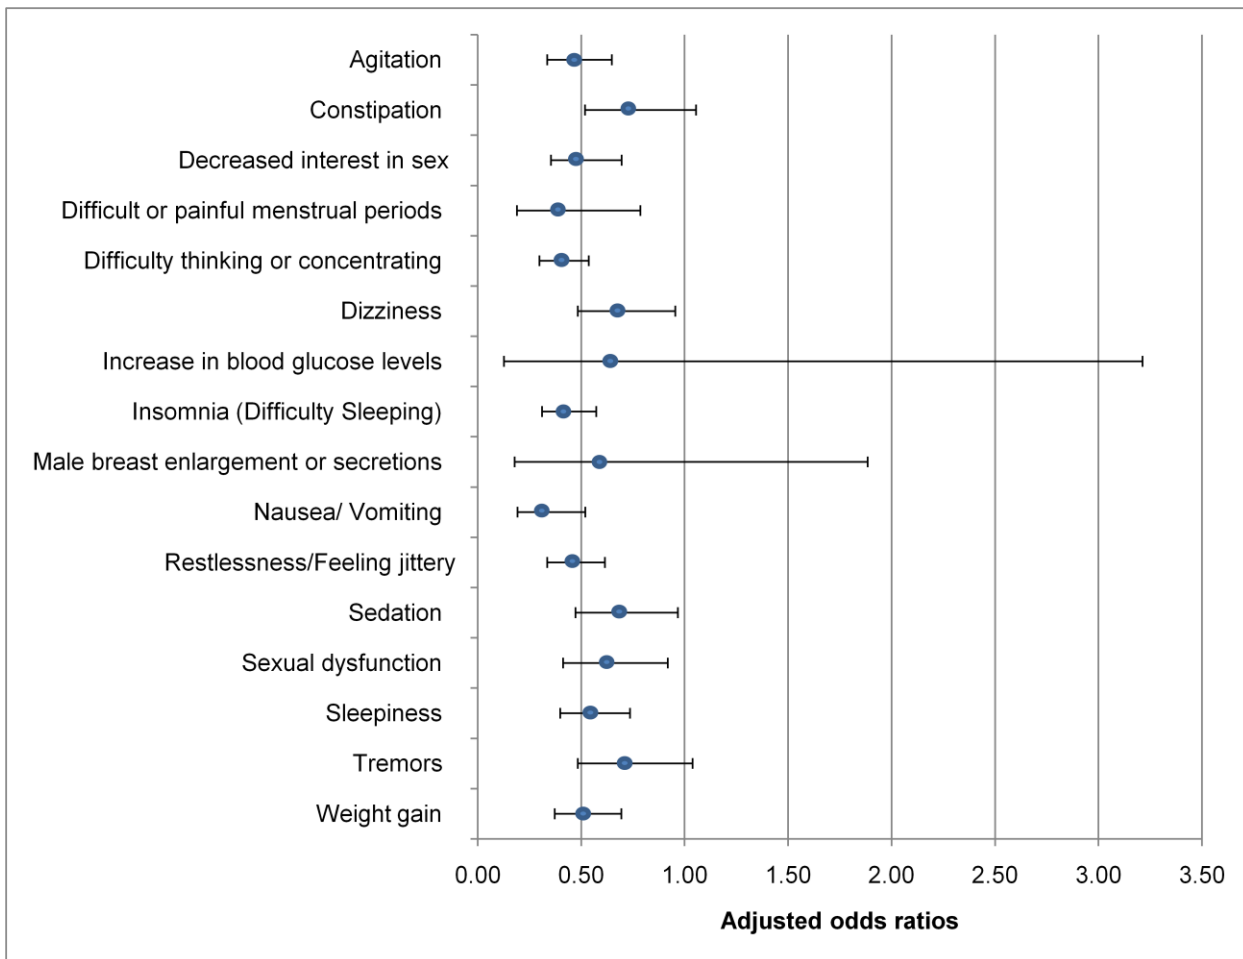

Odds ratios based on multivariable logistic regression with adherence as dependent variable  
 Adherence defined as a score of zero on the Morisky Medication Adherence Scale  
 Side effect was reported as present and “somewhat”, “very”, or “extremely bothersome”  
 95% Confidence Intervals are indicated
